# Supplementary material
Source: PubMed Central journal article supplement (PMC1885557)

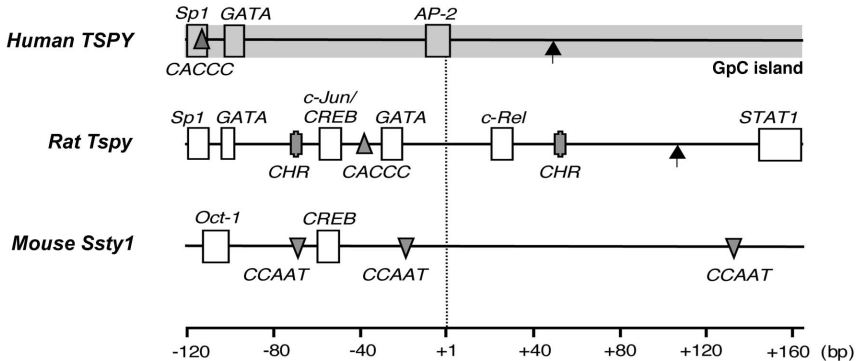

Supplement: NIHMS13593-supplement-02.pdf [file NIHMS13593-supplement-02.pdf]

**EGFP-TH2B**

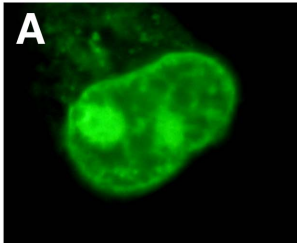

**DAPI**

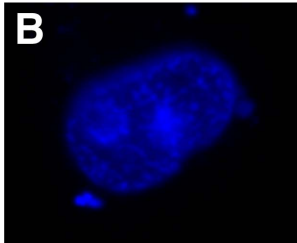

**anti-rTspy**

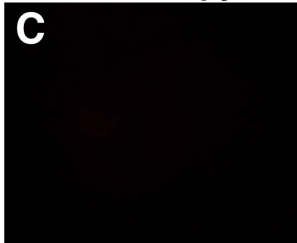

Supplement: NIHMS13593-supplement-03.pdf [file NIHMS13593-supplement-03.pdf]
